# Supplementary material for: Comparative Analysis of TPR Gene Family in Cucurbitaceae and Expression Profiling under Abiotic Stress in Cucumis melo L.
Source: MDPI journal article supplement (doi:10.3390/horticulturae10010083), 2024-01-15

*Cucumis melo* L. cv. DHL92

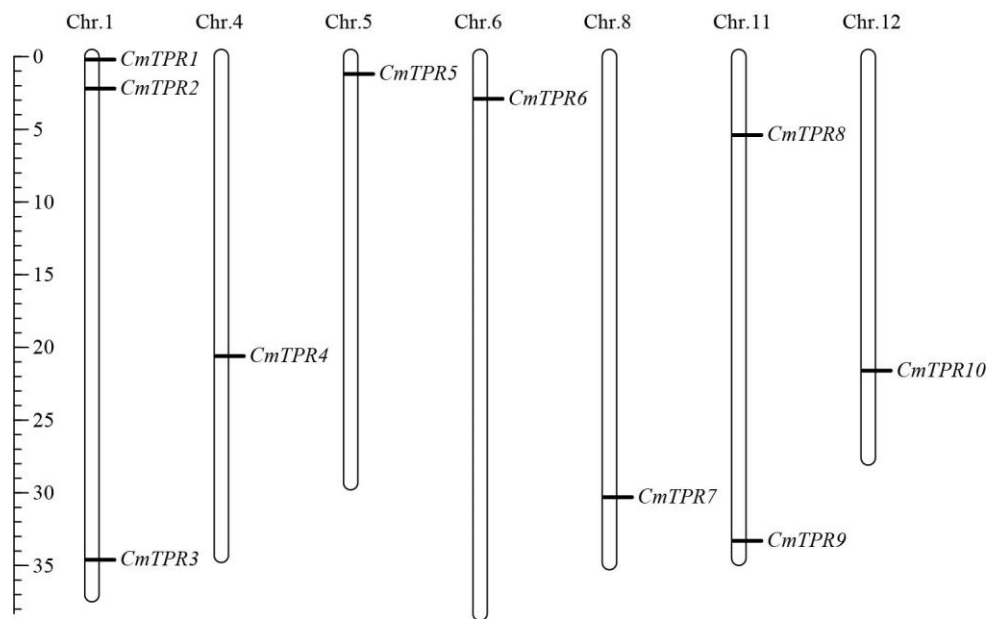

*Cucumis melo* subsp. *agrestis*

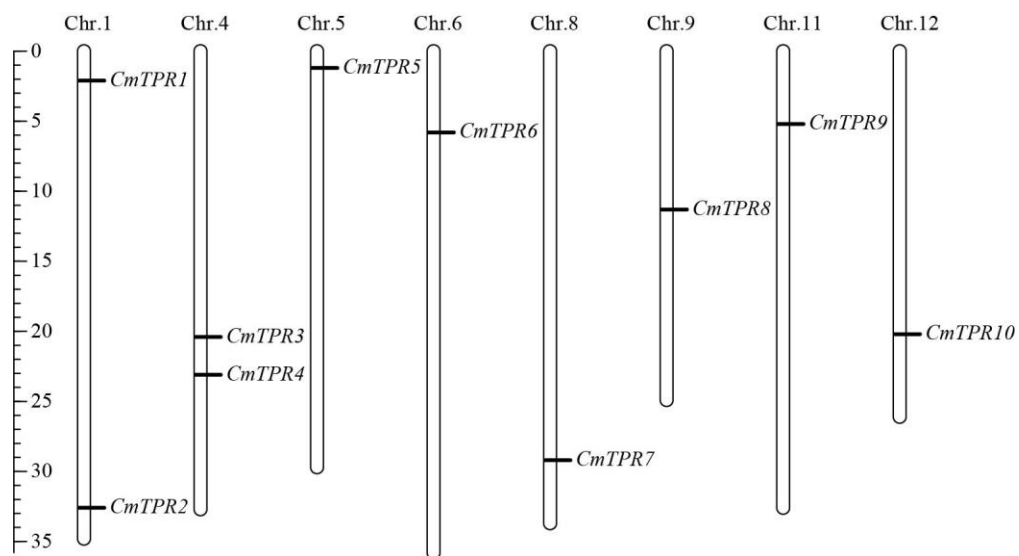

*Cucumis sativus* L. cv. Gy14

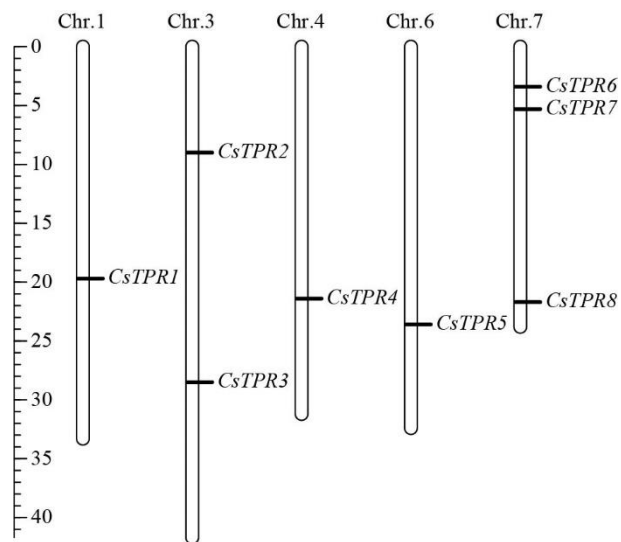

*Cucumis. sativus* L. var. *sativus* var. 9930

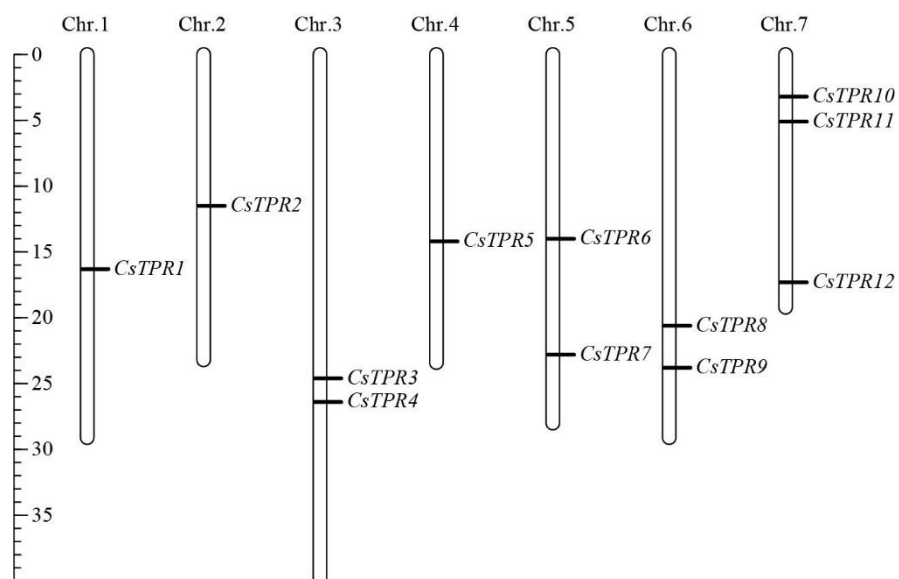

*Citrullus lanatus* subsp. *vulgaris* cv. Charleston Gray

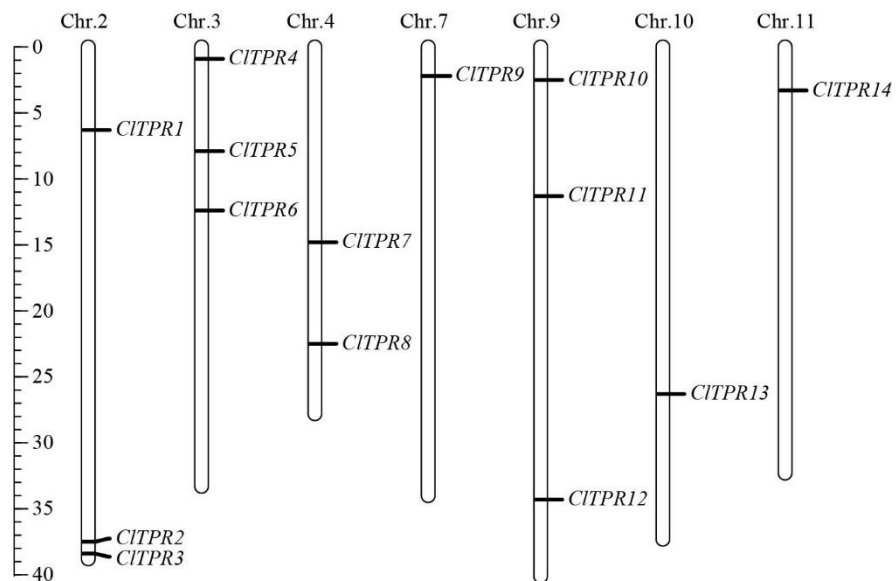

*Citrullus lanatus* subsp. *vulgaris* cv. 97103

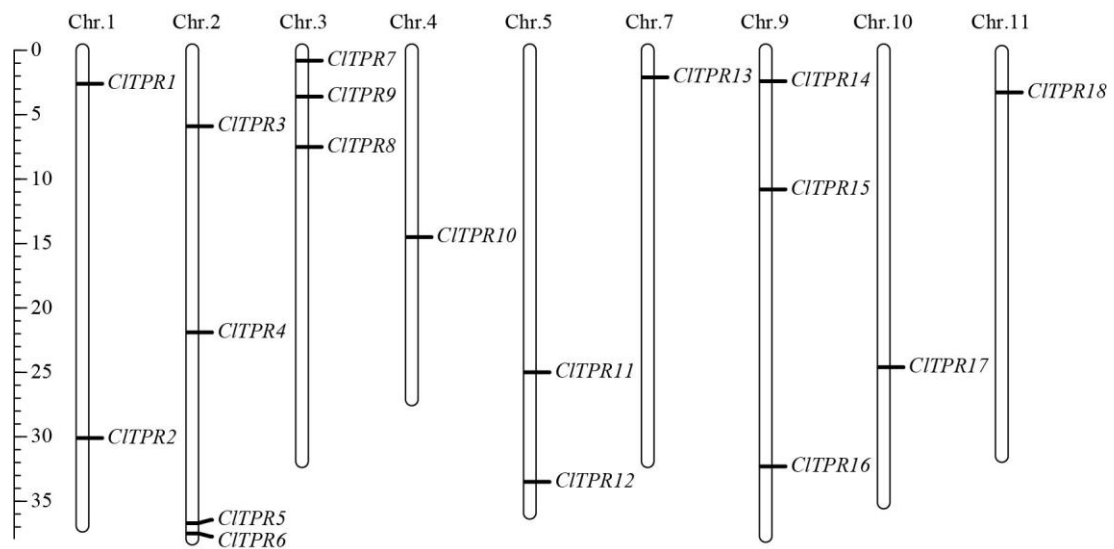

*Lagenaria siceraria* var. *USVL1VR-Ls*

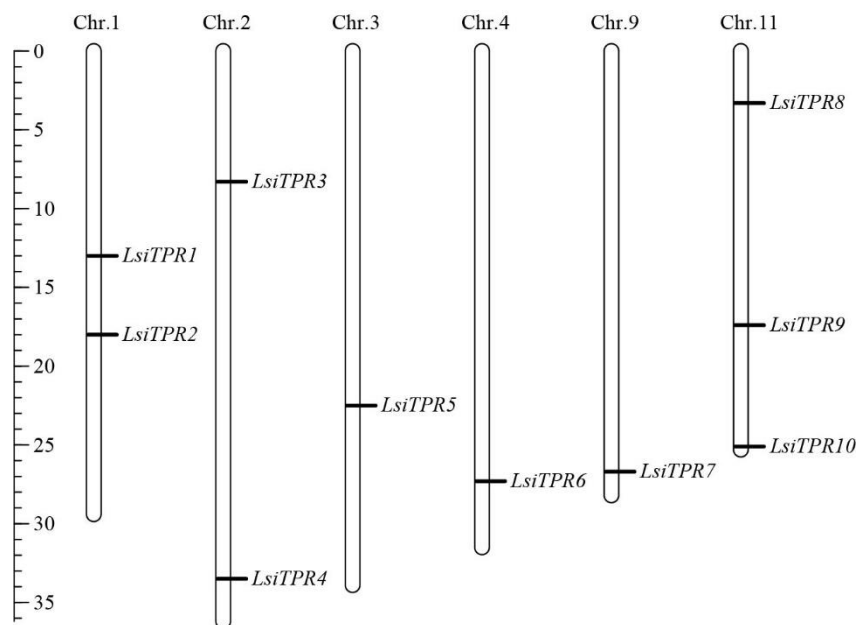

*Cucurbita moschata* var. *Rifu*

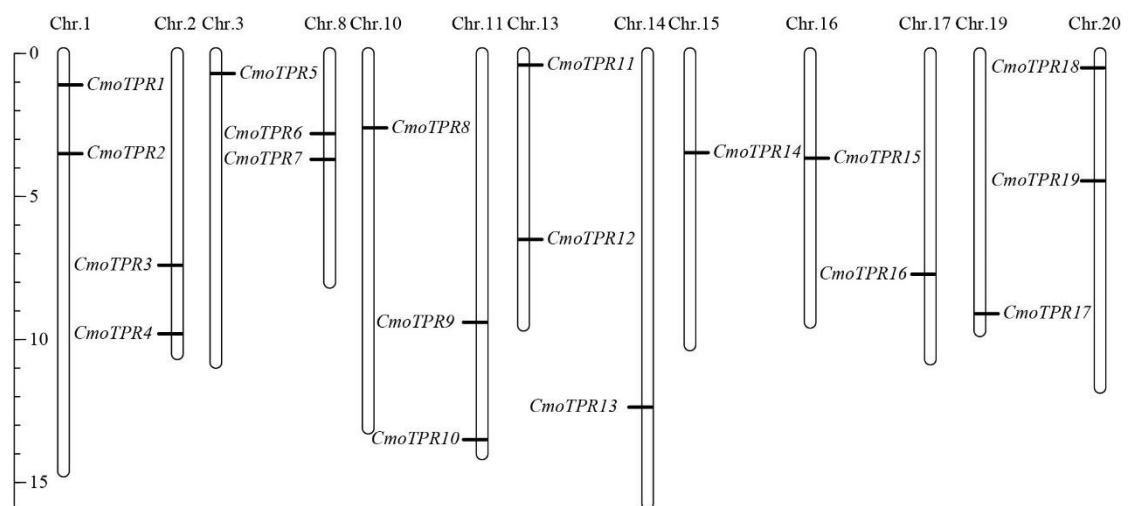

*Cucurbita maxima* var. *Rimu*

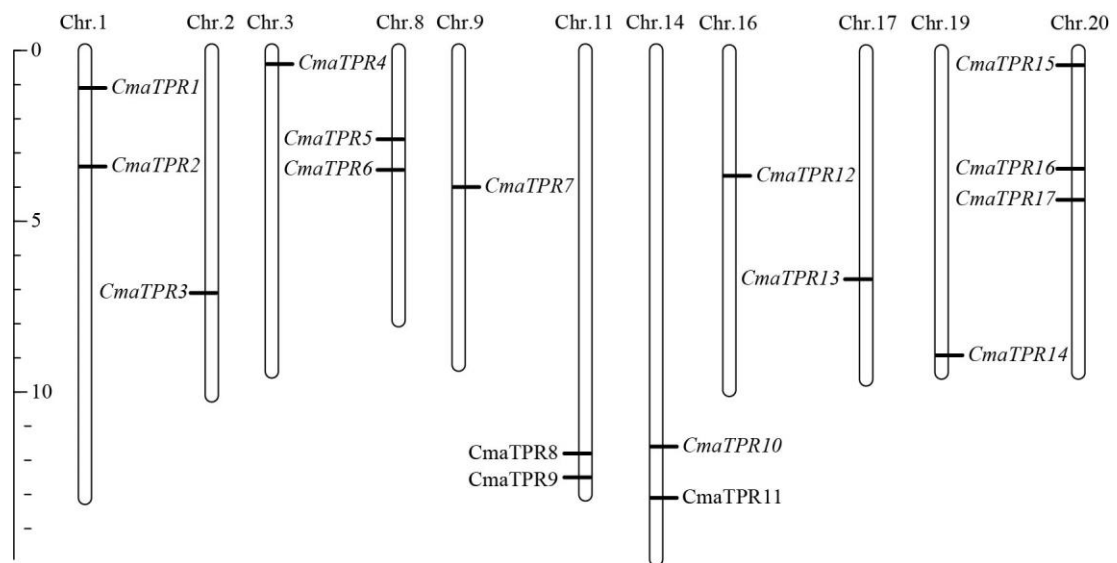

*Cucurbita pepo* subsp. *pepo*

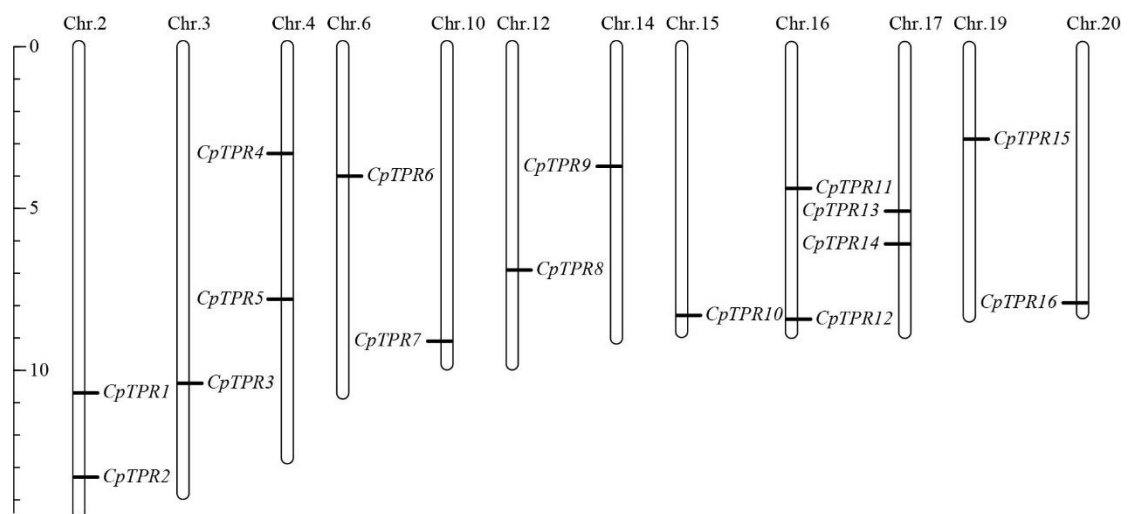

*Benincasa hispida* var. B227

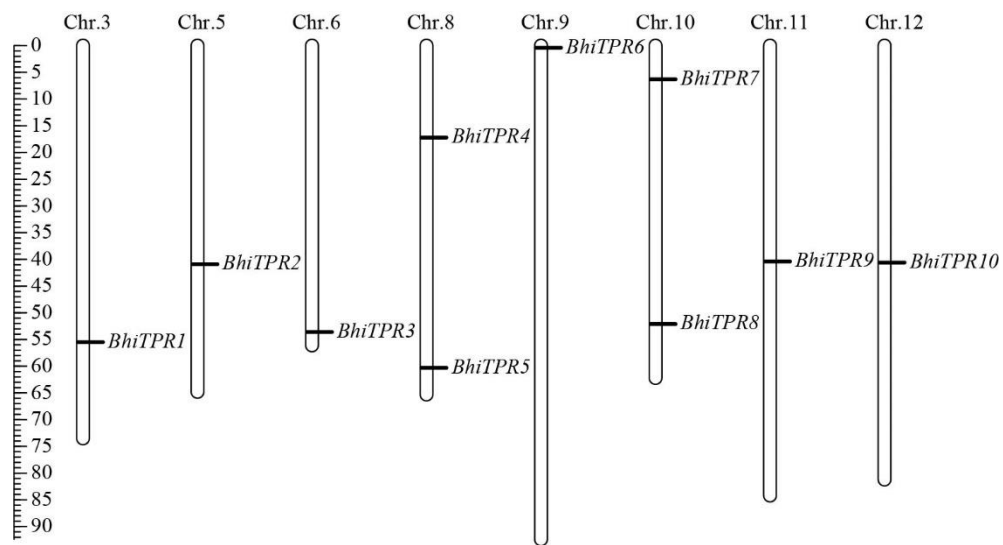

Supplement: s1 [file s1]
