# Supplementary figures and images for: Comparative Analysis of TPR Gene Family in Cucurbitaceae and Expression Profiling under Abiotic Stress in Cucumis melo L.
Source: MDPI journal article supplement (doi:10.3390/horticulturae10010083), 2024-01-15

Benincaseae tribe

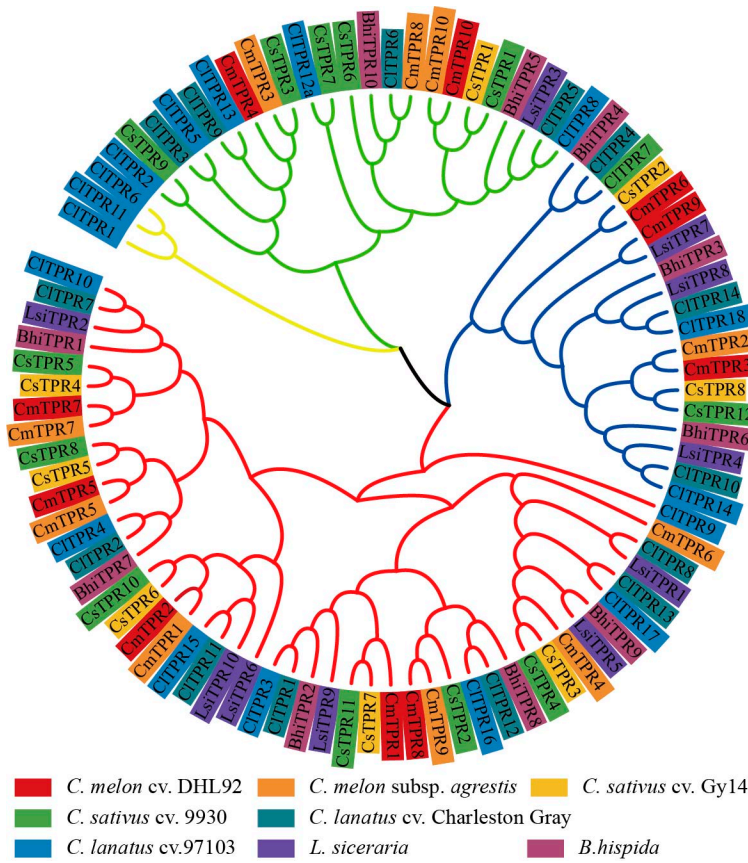

Cucurbitaceae tribe

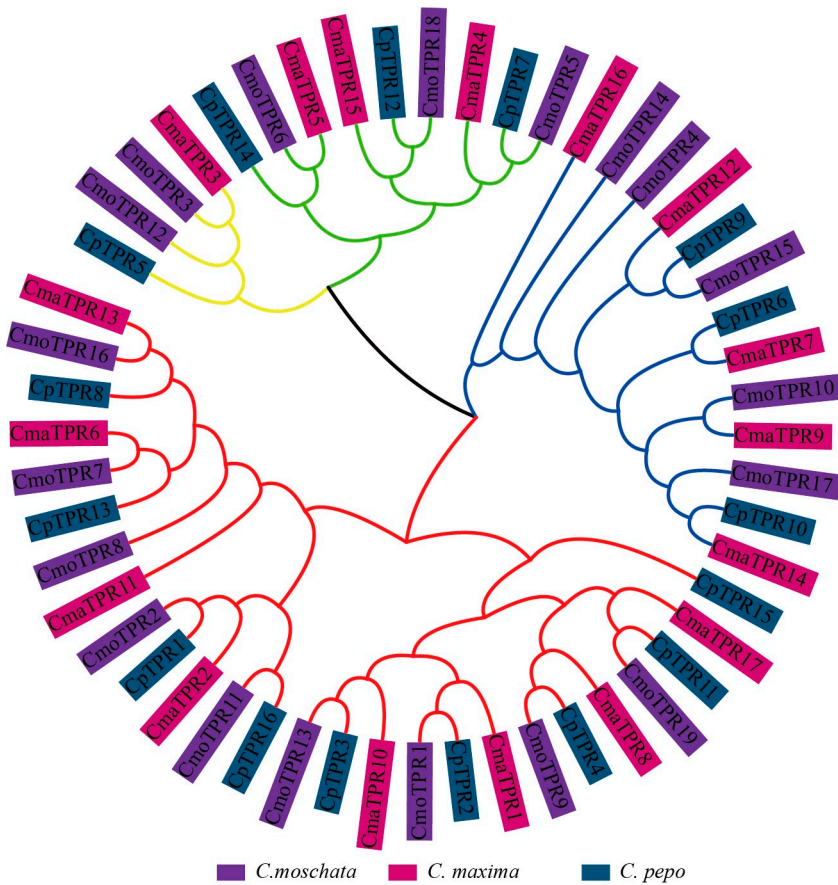

Supplement: s1 [file s1]
